# Supplementary material for: The accuracy of osteoporotic fracture risk prediction tools: a systematic review and meta-analysis
Source: HighWire-hosted journal article supplement (doi:10.1136/annrheumdis-2015-207907), 2015-08-07
Supplement: annrheumdis-2015-207907supp_tableS1.pdf [file annrheumdis-2015-207907supp_tableS1.pdf]

## Supplementary Table S1 – Search Strategy in PubMed MEDLINE

((("Osteoporosis"[Mesh] OR Osteoporoses OR Osteoporosis, Senile OR Osteoporoses, Senile OR Senile Osteoporoses OR Senile Osteoporosis OR Osteoporosis, Age Related OR Osteoporosis, Age Related OR Bone Loss, Age Related OR Age Related Bone Loss OR Age Related Bone Losses OR Bone Loss, Age Related OR Bone Losses, Age Related OR Age Related Osteoporosis OR Age Related Osteoporosis OR Age Related Osteoporoses OR Osteoporoses, Age Related OR "Osteoporosis, Postmenopausal"[Mesh] OR Perimenopausal Bone Loss OR Bone Loss, Postmenopausal OR Bone Losses, Postmenopausal OR Postmenopausal Bone Losses OR Osteoporosis, Post Menopausal OR Osteoporoses, Post Menopausal OR Osteoporosis, Post Menopausal OR Post Menopausal Osteoporoses OR Post Menopausal Osteoporosis OR Postmenopausal Osteoporosis OR Osteoporoses, Postmenopausal OR Postmenopausal Osteoporoses OR Bone Loss, Perimenopausal OR Bone Losses, Perimenopausal OR Perimenopausal Bone Losses OR Postmenopausal Bone Loss OR "Decalcification, Pathologic"[Mesh] OR Decalcification, Pathological OR Pathologic Decalcification OR Pathologic Decalcification OR Involutional Osteoporosis Primary Osteoporosis OR Bone Fragility Endocrine Osteoporosis OR Osteoporotic Decalcification OR "Bone Density"[Mesh] OR Bone Densities OR Density, Bone OR Bone Mineral Density OR Bone Mineral Densities OR Density, Bone Mineral OR Bone Mineral Content OR Bone Mineral Contents OR BMD OR Bone mineral density[All Fields] OR (low bone mass) OR (low bone mass density) OR (low bone mineral density) OR (low bone mass premenopausal women) OR (low bone) OR (low bone density) OR (postmenopausal bone loss) OR (bone loss osteoporosis) OR (bone loss postmenopausal) OR (bone loss)))) AND (("osteoporotic fractures"[MeSH Terms] OR fracture, Osteoporotic OR Fractures, Osteoporotic OR Osteoporotic Fracture OR "Fractures, Bone"[Mesh] OR Broken Bones OR Bone, Broken OR Bones, Broken OR Broken Bone OR Bone Fractures OR Bone Fracture OR Fracture, Bone OR Fracture OR (hip fracture)))) AND (("Questionnaires"[Mesh] OR Questionnaire OR Questionnaire Design OR Designs, Questionnaire OR Designs, Questionnaire OR Questionnaire Designs OR NOF OR (National Osteoporosis Foundation) OR SCORE OR (Simple Calculated Osteoporosis Risk Estimation) OR ORAI OR (Osteoporosis Risk Assessment Instrument) OR ABONE OR (Aged Body Size No Estrogen) OR FRAX OR (fracture risk assessment tool) OR (FRACTUREindex) OR ("FRACTURE index") OR OSTT OR (Osteoporosis Self assessment Tool) OR "OST (OSTA)" OR DOEScore OR (Dubbo Osteoporosis Epidemiology Study) OR FOSTA OR (Female Osteoporosis Self assessment Tool for Asia) OR Self-assessment Tool OR SOFSURF OR EPIDOS study OR EPIDemiologie de l'Osteoporose OR EPIDOS fracture study OR Weight only EPIDOS OR "WOE" OR FNBMd OR "Bone mineral density at the femoral neck") OR "pBW" OR IOF OR (International Osteoporosis Foundation) OR Garvan OR KKOS OR OSIRIS OR DVO OR MORES OR Qfracture OR QFractureScores OR "Risk Assessment"[Mesh] OR Assessments, Risk OR Risk Assessments OR Assessment, Risk OR Risks and Benefits OR Benefits and Risks OR Benefit Risk Assessment OR Assessment, Benefit Risk OR Assessments, Benefit Risk OR Benefit Risk Assessment OR Benefit Risk Assessments OR Risk Benefit Assessment OR Assessment, Risk Benefit OR Assessments, Risk Benefit OR Risk Benefit Assessment OR Risk Benefit Assessments OR "Risk Factors"[Mesh] OR Factor, Risk OR Factors, Risk OR Risk Factor OR Risk index OR Risk score OR Risk stratification OR "Risk"[Mesh] OR Risks OR Relative Risk OR Relative Risks OR Risk, Relative OR Risks, Relative OR scale risk OR clinical risk stratification instruments OR prognostic score OR score prediction OR scoring system OR Screen OR Screening OR "Algorithms"[Mesh] OR Algorithm\*)) AND (("Dimensional Measurement Accuracy"[Mesh] OR (Accuracies, Dimensional Measurement) OR (Accuracy, Dimensional Measurement) OR (Dimensional Measurement Accuracies) OR (Measurement Accuracies, Dimensional) OR (Measurement Accuracy, Dimensional) OR "Area Under Curve"[Mesh] OR Area Under Curves OR Curve, Area Under OR Curves, Area Under OR Under Curve, Area OR Under Curves, Area OR AUC OR Harrell's C value OR likelihood ratio OR likelihood positive ratio OR likelihood negative ratio OR ROC curve OR ROC curves OR "Sensitivity and Specificity"[Mesh] OR Specificity and Sensitivity OR Specificity OR Sensitivity OR "Predictive Value of Tests"[Mesh] OR "False Positive Reactions"[Mesh] OR False Positive Reaction OR Positive Reaction, False OR Positive Reactions, False OR Reaction, False Positive OR Reactions, False Positive OR False positive OR False negative OR True positive OR True Negative OR "False Negative Reactions"[Mesh] OR False Negative Reaction OR Reaction, False Negative OR Reactions, False Negative OR "Reproducibility of Results"[Mesh] OR Reproducibility of Findings OR Reliability AND (Epidemiology) OR Reliabilities AND (Epidemiology) OR Validity AND (Epidemiology) OR Validities AND (Epidemiology) OR Validity of Results OR Reliability and Validity OR Validity and Reliability OR Reliability of Results OR "Feasibility Studies"[Mesh] OR Feasibility Study OR Studies, Feasibility OR Study, Feasibility OR Feasibility OR "Validation Studies as Topic"[Mesh] OR construct validity OR validation studies OR validation study OR validity reliability OR reliability validity OR validity OR validated OR validated study OR validated studies OR applicability OR clinimetric properties OR Psychometrics AND "[Mesh] OR Psychometric OR responsive OR responsiveness OR validation[tiab] OR validate[tiab] OR reproducib\*[tiab] OR " AND psychometrics AND "[MeSH] OR psychometr\*[tiab] OR clinimetr\*[tiab] OR clinometr\*[tiab] OR reliab\* [tiab] OR valid\*[tiab] OR reliability validity assessment OR " AND Evaluation Studies as Topic Mesh OR Evaluation OR Evaluations OR Evaluation Indexes OR Indexes, Evaluation OR Use Effectiveness OR Methodology, Evaluation OR Evaluation Methodologies OR Methodologies, Evaluation OR Evaluation Methodology OR PrePost Tests OR Pre Post Tests OR PrePost Test OR Test, PrePost OR Tests, PrePost OR Qualitative Evaluation OR Evaluation, Qualitative OR Evaluations, Qualitative OR Qualitative Evaluations OR Quantitative Evaluation OR Evaluation, Quantitative OR Evaluations, Quantitative OR Quantitative Evaluations OR Theoretical Effectiveness OR Effectiveness, Theoretical OR Critique OR Critiques)) Filters: Publication date from 2003/01/01
