# Supplementary material for: The accuracy of osteoporotic fracture risk prediction tools: a systematic review and meta-analysis
Source: HighWire-hosted journal article supplement (doi:10.1136/annrheumdis-2015-207907), 2015-08-07
Supplement: annrheumdis-2015-207907supp_tableS4.pdf [file annrheumdis-2015-207907supp_tableS4.pdf]

**Supplementary Table S4 - Main characteristics of the studies included in this systematic literature review.**

| Study                                                | Setting (Country)                       | Study design and duration of follow-up    | Exclusion criteria                                                                                | Population at baseline (N) | Population available for event verification | % women          | Mean age (range)                             | Number of fractures per site                                                            | Fractures ascertainment                                                   | AUC                                                                                                                                                                          |
|------------------------------------------------------|-----------------------------------------|-------------------------------------------|---------------------------------------------------------------------------------------------------|----------------------------|---------------------------------------------|------------------|----------------------------------------------|-----------------------------------------------------------------------------------------|---------------------------------------------------------------------------|------------------------------------------------------------------------------------------------------------------------------------------------------------------------------|
| <b>Computer model for osteoporotic fracture risk</b> |                                         |                                           |                                                                                                   |                            |                                             |                  |                                              |                                                                                         |                                                                           |                                                                                                                                                                              |
| Etinger (2005) [35]                                  | Gen. Pop. (USA)                         | Prosp. Cohort 5 yrs                       | Any described                                                                                     | NA                         | DM - >400,000<br>VM-NA                      | 100%             | NA (45-79)                                   | Hip, humerus, and wrist-14,528<br>Hip - 3,412                                           | NA                                                                        | NA                                                                                                                                                                           |
| <b>FRAMO</b>                                         |                                         |                                           |                                                                                                   |                            |                                             |                  |                                              |                                                                                         |                                                                           |                                                                                                                                                                              |
| Albertsson (2007) [36]                               | Gen. Pop. (Sweden)                      | Prosp. Cohort 2 yrs                       | NA                                                                                                | 1,498                      | 1,248                                       | 100%             | 78.8 yrs (70-100)                            | Hip-31                                                                                  | GP records                                                                | Hip-0.72<br>Mortality-0.75                                                                                                                                                   |
| Albertsson (2010) [37]                               | Gen. Pop. (Sweden)                      | Prosp. Cohort 2 yrs                       | NA                                                                                                | 390                        | 285                                         | 100%             | 79 yrs (72-98)                               | Hip, distal radius, proximal humerus, pubic bone, ischial bone, vertebrae - 14<br>Hip-7 | Radiographic confirmed                                                    | NA                                                                                                                                                                           |
| <b>FRAX®</b>                                         |                                         |                                           |                                                                                                   |                            |                                             |                  |                                              |                                                                                         |                                                                           |                                                                                                                                                                              |
| Kanis (2007) [32]*                                   | Differs with cohort (Several countries) | Prosp. Cohort DM-3,2 yrs<br>VM-NA         | Differs with cohort                                                                               | NA                         | DM-46,340<br>VM-230,486                     | DM -68%<br>VM-NA | DM - 65 yrs (20-106)<br>VM - 63 yrs (35-116) | DM<br>MOP -3,360<br>Hip - 850<br>VM<br>MOP -15,183<br>Hip - 3,318                       | Depends on the study                                                      | DM<br>With BMD<br>MOP - 0.62<br>Hip - 0.74<br>Without BMD<br>MOP -0.60<br>Hip - 0.66<br>VM<br>With BMD<br>MOP: - 0.63<br>Hip - 0.78<br>Without BMD<br>MOP -0.62<br>Hip -0.67 |
| Donaldson (2009) [43]*                               | Post. Menop. (USA)                      | RCT 3.8yrs                                | Use of systemic glucocorticoids                                                                   | 3,223                      | 3,043                                       | 100%             | 68.2yrs (55-81)                              | MOP - 253<br>Vertebral only - 223                                                       | Self reported and radiographic confirmed. Vertebral frc confirmed by Xray | With BMD<br>MOP-0.71<br>Without BMD<br>MOP -0.68                                                                                                                             |
| Ensrud (2009) [44]*                                  | Gen. Pop. (USA)                         | Prosp. Cohort MOP-8.7 yrs<br>Hip- 9.2 yrs | Black women. Women unable to walk without assistance or with history of bilateral hip replacement | 9,704                      | 6,252                                       | 100%             | 71.3yrs (≥ 65)                               | MOP-1,037<br>Hip-389                                                                    | Self reported and radiographic confirmed                                  | With BMD<br>MOP -0.68<br>Hip -0.75<br>Without BMD<br>MOP-0.64                                                                                                                |

|                           |                       |                       |                                                                                                                             |       |        |       |                            |                                           |                                                     |                                                                                                                                                                                                                                                                                                    |
|---------------------------|-----------------------|-----------------------|-----------------------------------------------------------------------------------------------------------------------------|-------|--------|-------|----------------------------|-------------------------------------------|-----------------------------------------------------|----------------------------------------------------------------------------------------------------------------------------------------------------------------------------------------------------------------------------------------------------------------------------------------------------|
|                           |                       |                       |                                                                                                                             |       |        |       |                            |                                           |                                                     | Hip-0.71                                                                                                                                                                                                                                                                                           |
| Leslie (2010) [51]*       | OP Screen. (Canada)   | Prosp. Cohort NA      | None                                                                                                                        | NA    | 39,603 | 92.8% | W 65.7yrs M 68.2yrs (≥50)  | MOP-2,543 Hip-549                         | Radiographic confirmed                              | With BMD<br>MOP -0.69<br>Hip -0.83<br>Without BMD<br>MOP-0.66<br>Hip-0.79                                                                                                                                                                                                                          |
| Sornay-Rendu (2010) [56]  | Gen. Pop. (France)    | Prosp. Cohort 10yrs   | Women with diseases or treatment that affect bone metabolism. HRT use in the last 12 months.                                | 867   | 867    | 100%  | 58.8 yrs (≥ 40)            | MOP-82 Hip-17                             | Self-reported and radiographic confirmed            | With BMD<br>MOP -0.78<br>Without BMD<br>MOP -0.75                                                                                                                                                                                                                                                  |
| Tremollieres (2010) [76]* | Post. Menop. (France) | Prosp. Cohort 13.4yrs | Women treated for osteoporosis > 3 months (with the exception of parathyroid hormone and calcium/vitamin D supplementation. | 4,024 | 2,651  | 100%  | 54 yrs (≥ 45)              | MOP-145 Hip-13                            | Self-reported and radiographic confirmed            | Without BMD<br>MOP -0.63                                                                                                                                                                                                                                                                           |
| Fraser (2011) [46]*       | Gen. Pop. (Canada)    | Prosp. Cohort 10yrs   | Any described                                                                                                               | NA    | 6,697  | 71.3% | W 65.8 yrs M 65.3yrs (≥50) | MOP: W-12%; M-6.4%<br>Hip: W-2.7%; M-2.4% | Self reported and radiographic confirmed            | With BMD<br>MOP -0.69<br>Hip -0.80<br>Without BMD<br>MOP-0.66<br>Hip-0.77                                                                                                                                                                                                                          |
| Hillier (2011) [49]       | Gen. Pop. (USA)       | Prosp. Cohort 9.4yrs  | Women unable to walk without assistance and with bilateral hip replacements                                                 | 7,963 | 6,252  | 100%  | 71 yrs (≥ 65 )             | MOP- 1,011 Hip-368                        | Self reported and radiographic confirmed            | With BMD<br>MOP (Normal- 0.64;<br>Low bone mass-0.61;<br>Osteoporotic-0.61)<br>Hip (Normal- 0.78; Low bone mass-0.70;<br>Osteoporotic-0.62)<br><br>Without BMD<br>MOP (Normal- 0.62;<br>Low bone mass-0.59;<br>Osteoporotic-0.61)<br>Hip (Normal- 0.79; Low bone mass- 0.66;<br>Osteoporotic-0.63) |
| Leslie (2011) [50]        | OP Screen. (Canada)   | Retr. Cohort 5.5yrs   | Available on a different source                                                                                             | NA    | 36,368 | 93.1% | 65.2 yrs (≥ 50)            | MOP-2.321                                 | Confirmed at the discharge diagnostics or hospital. | MOP-0.69 to 0.70                                                                                                                                                                                                                                                                                   |
| Leslie (2011)             | OP Screen.            | Retr. Cohort          | Available on a different source                                                                                             | NA    | 37,032 | 100%  | NA                         | MOP-1,748                                 | Confirmed at the                                    | MOP- 0.67 to 0.75                                                                                                                                                                                                                                                                                  |

|                                     |                         |                                                   |                                                                                                                                                                                                                                                                                                                                                                                                                                                                 |       |        |      |                      |                                          |                                                     |                                                                           |
|-------------------------------------|-------------------------|---------------------------------------------------|-----------------------------------------------------------------------------------------------------------------------------------------------------------------------------------------------------------------------------------------------------------------------------------------------------------------------------------------------------------------------------------------------------------------------------------------------------------------|-------|--------|------|----------------------|------------------------------------------|-----------------------------------------------------|---------------------------------------------------------------------------|
| [52]                                | (Canada)                | DM- 5.5 yrs<br>VM- 5.6 yrs                        |                                                                                                                                                                                                                                                                                                                                                                                                                                                                 |       |        |      | (≥ 45)               |                                          | discharge<br>diagnostics or<br>hospital.            |                                                                           |
| Pressman<br>(2011) [53]*            | OP Screen.<br>(USA)     | Retr. Cohort<br>6.6 yrs                           | Women who did not have at least 1 yr of continuous membership both before and after the DXA scan date, those in whom DXA data were not electronically accessible, and those with missing race/ethnicity and those who had filled a prescription for a bisphosphonate in the year before the DXA test.                                                                                                                                                           | NA    | 94,489 | 100% | NA<br>(50-85)        | Hip-1,579                                | Confirmed at the discharge diagnostics or hospital. | With BMD<br>Hip -0.84<br>Without BMD<br>Hip-0.83                          |
| Tamaki<br>(2011) [58]               | Post. Menop.<br>(Japan) | Prosp. Cohort<br>10 yrs                           | Women who did not have femoral neck BMD measurements at the baseline survey, and women taking osteoporosis drugs or HRT at the baseline survey                                                                                                                                                                                                                                                                                                                  | 1,040 | 815    | 100% | 56.7yrs<br>(40-74)   | MOP-43<br>Hip - 4                        | Self-reported at each follow-up                     | With BMD<br>MOP -0.69<br>Hip -0.88<br>Without BMD<br>MOP-0.67<br>Hip-0.86 |
| Cheung<br>(2012) [41]*              | Post. Menop.<br>(China) | Prosp. Cohort<br>4.5 yrs                          | Women with prescribed osteoporosis treatment                                                                                                                                                                                                                                                                                                                                                                                                                    | NA    | 2,266  | 100% | 62.1 yrs<br>(40-90)  | MOP- 106<br>21                           | Hip-<br>Self-reported and radiographic confirmed    | With BMD<br>MOP -0.73<br>Hip -0.88<br>Without BMD<br>MOP-0.71<br>Hip-0.89 |
| González-<br>Macias<br>(2012) [48]* | Gen. Pop.<br>(Spain)    | Prosp. Cohort<br>Median 36.1<br>months            | Paget's disease, multiple myeloma, bone metastases, renal failure, hypercalcemia, immobilization for >3 months in the preceding year, anatomical anomalies of the right foot interfering with calcaneal ultrasound measurement, therapeutic doses of fluoride for more than 3 months in the past two yrs or for more than 2 yrs at any time in life, a life expectancy of less than 3 yrs, or participation in any other investigational study involving drugs. | 5,146 | 4,453  | 100% | 72.3 yrs<br>(65-100) | MOP- 201<br>50                           | Hip-<br>Self-reported and radiographic confirmed    | Without BMD<br>MOP-0.62<br>Hip-0.64                                       |
| Ettinger<br>(2013) [45]*            | Gen. Pop.<br>(USA)      | Prosp. Cohort<br>8.4 yrs                          | Men who had used a bisphosphonate within 30 days prior to the baseline visit                                                                                                                                                                                                                                                                                                                                                                                    | 5,994 | 4,291  | 0%   | 73.6 yrs<br>(≥ 65)   | MOP-374<br>Hip-161                       | Self-reported and radiographic confirmed            | With BMD<br>MOP-0.67<br>Hip-0.77<br>Without BMD<br>MOP-0.63<br>Hip-0.69   |
| Premaor<br>(2013) [62]              | Gen. Pop.<br>(USA)      | Prosp. Cohort<br>Obese- 9.1 yrs<br>Non-obese- 9.0 | Women unable to walk without assistance, with bilateral hip replacements and black women                                                                                                                                                                                                                                                                                                                                                                        | 9,704 | 6,049  | 100% | NA<br>(≥ 65)         | MOP:<br>Obese- 26.9%<br>Non-obese- 32.7% | Self-reported and radiographic confirmed            | No additional information provided by authors                             |

|                             |                        |                            |                                                                                                                                                                                                                                                                                                  |         |          |       |                       |                    |                                                    |                                                                                                                       |
|-----------------------------|------------------------|----------------------------|--------------------------------------------------------------------------------------------------------------------------------------------------------------------------------------------------------------------------------------------------------------------------------------------------|---------|----------|-------|-----------------------|--------------------|----------------------------------------------------|-----------------------------------------------------------------------------------------------------------------------|
| Tebe Cordomi, 2013 [60]*    | OP Screen. (Spain)     | Retr. Cohort Median-11 yrs | NA                                                                                                                                                                                                                                                                                               | 2,086   | 1,231    | 100%  | 56.8 yrs (40-90)      | MOP-222 Hip-13     | Self-reported                                      | With BMD MOP-0.61                                                                                                     |
| Azagra (2014) [38]          | OP Screen. (Spain)     | Prosp. Cohort 10 yrs       | Women with wrong number for contact, no responders to 3 calls, treated to osteoporosis at baseline or during follow up (with exception of supplements). Women died during follow up.                                                                                                             | 3,247   | 816      | 100%  | 56.8 yrs (40-90)      | MOP-49 Hip-15      | Confirmed at the GP or hospital.                   | With BMD MOP-0.74<br>Without BMD MOP- 0.73                                                                            |
| Brennan (2014) [40]         | OP Screen. (Canada)    | Prosp. Cohort 6.2 yrs      | NA                                                                                                                                                                                                                                                                                               | NA      | 51,327   | 100%  | 65.9yrs ≥ 50          | MOP- 3723 Hip-1027 | Confirmed at the discharge diagnostics or hospital | With BMD MOP- Q1- 0.68 Q5-0.71<br>Hip- Q1- 0.79 Q5-0.87<br>Without BMD MOP- Q1- 0.65 Q5-0.68<br>Hip- Q1- 0.76 Q5-0.85 |
| Friis-Holmberg (2014) [47]* | Gen. Pop. (Denmark)    | Prosp. Cohort 4.3 yrs      | Participants were excluded if height or weight was missing                                                                                                                                                                                                                                       | 18,065  | 12,758   | 59.2% | 56.8 yrs (40-90)      | MOP- 395 Hip-54    | Recorded on the GP computer                        | Without BMD MOP- M- 0.63; W-0.68<br>Hip- M- 0.76; W-0.86                                                              |
| Sund (2014) [57]*           | Post. Menop. (Finland) | Prosp. Cohort 10 yrs       | Women who experienced a hip fracture before 1994                                                                                                                                                                                                                                                 | 13,917  | 11,182   | 100%  | 57.3 yrs (52.4-62.7)  | Hip-117            | Self-reported and radiographic confirmed           | With BMD Hip-0.76<br>Without BMD Hip- 0.65                                                                            |
| <b>FRC</b>                  |                        |                            |                                                                                                                                                                                                                                                                                                  |         |          |       |                       |                    |                                                    |                                                                                                                       |
| Lo (2011) [63]              | OP Screen. (USA)       | Retr. Cohort 6.6 yrs       | Women who did not have at least 1 yr of continuous membership both before and after the DXA scan date, those in whom DXA data were not electronically accessible, and those with missing race/ethnicity and those who had filled a prescription for a bisphosphonate in the year before the DXA. | 120,972 | 94,489   | 100%  | 62.8 yrs (50-85)      | Hip-1,579          | Confirmed at the discharge diagnostics or hospital | With BMD Hip-0.85<br>Without BMD Hip- 0.83                                                                            |
| Ettinger (2012) [64]        | Gen. Pop. (USA)        | Prosp. Cohort 9.2 yrs      | Men who had used a bisphosphonate within 30 days prior to the baseline visit                                                                                                                                                                                                                     | 5,994   | 5,893    | 0%    | 73.6 yrs (≥ 65)       | MOP-335 Hip-156    | Self-reported and radiographic confirmed           | With BMD MOP-0.70<br>Hip-0.79<br>Without BMD MOP-0.66<br>Hip-0.71                                                     |
| <b>FRISC</b>                |                        |                            |                                                                                                                                                                                                                                                                                                  |         |          |       |                       |                    |                                                    |                                                                                                                       |
| Tanaka (2010) [65]          | Post. Menop. (Japan)   | Prosp. Cohort DM-5.3 yrs   | DM-Women with metabolic bone disease and secondary osteoporosis                                                                                                                                                                                                                                  | 2,187   | DM-1,787 | 100%  | DM - 63.4 yrs (45-81) | DM MOP- 383        | Available on a different source                    | VM With BMD                                                                                                           |

|                                  |                           |                                                            |                                                                                                                                 |       |                          |       |                                                                        |                                                                                 |                                                                                                                                                                          |                                                                                                                                                                                 |
|----------------------------------|---------------------------|------------------------------------------------------------|---------------------------------------------------------------------------------------------------------------------------------|-------|--------------------------|-------|------------------------------------------------------------------------|---------------------------------------------------------------------------------|--------------------------------------------------------------------------------------------------------------------------------------------------------------------------|---------------------------------------------------------------------------------------------------------------------------------------------------------------------------------|
|                                  |                           | VM- 10 yrs                                                 |                                                                                                                                 |       | VM-400                   |       | VM - 59.5 yrs<br>(41-77)                                               | Immobilization- 83<br><br>VM<br>MOP- 60                                         |                                                                                                                                                                          | MOP- 0.727                                                                                                                                                                      |
| <b>FRISC + FRAX<sup>®</sup></b>  |                           |                                                            |                                                                                                                                 |       |                          |       |                                                                        |                                                                                 |                                                                                                                                                                          |                                                                                                                                                                                 |
| Tanaka<br>(2011) [59]            | Post. Menop.<br>(Japan)   | Prosp. Cohort<br>5.1 yrs                                   | Women receiving treatment for<br>osteoporosis, and diseases related to<br>secondary osteoporosis                                | 2,010 | 765                      | 100%  | 63.3 yrs<br>(NA)                                                       | Clinical and morphometric<br>vertebral fractures- 141<br>Long bone fractures-49 | Vertebral<br>fractures were<br>evaluated using<br>radiographs<br>taken at baseline<br>and during the<br>follow-up. No<br>reference to the<br>other types of<br>fractures | Vertebral frt:<br>FRAX <sup>®</sup> 0.690,<br>FRISC 0.702,<br>Pentosidine+FRISC<br>0.732.<br><br>Vertebral frt and long<br>bone frt:<br>FRAX <sup>®</sup> 0.671,<br>FRISC 0.685 |
| <b>FRISK</b>                     |                           |                                                            |                                                                                                                                 |       |                          |       |                                                                        |                                                                                 |                                                                                                                                                                          |                                                                                                                                                                                 |
| Henry (2006)<br>[66]             | Gen. Pop.<br>(Australia)  | Cros. Cohort<br>2.0 yrs                                    | NA                                                                                                                              | NA    | Cases-231<br>Control-448 | 100%  | Cases-74 yrs<br>Control-72 yrs<br>(≥60)                                | NA                                                                              | Radiology<br>reports                                                                                                                                                     | NA                                                                                                                                                                              |
| Henry (2011)<br>[67]             | Gen. Pop.<br>(Australia)  | Prosp. Cohort<br>Median-9.6 yrs                            | NA                                                                                                                              | 600   | 600                      | 100%  | Median-74 yrs<br>(≥50)                                                 | MOP-125<br>Hip-34                                                               | Radiology<br>reports                                                                                                                                                     | With BMD<br>MOP-0.66<br>Without BMD<br>MOP-0.62                                                                                                                                 |
| <b>GARVAN</b>                    |                           |                                                            |                                                                                                                                 |       |                          |       |                                                                        |                                                                                 |                                                                                                                                                                          |                                                                                                                                                                                 |
| Nguyen<br>(2007) [34]            | Gen. Pop.<br>(Australia)  | Prosp. Cohort<br>Median-13 yrs                             | NA                                                                                                                              | 3,676 | 1,768                    | 58%   | NA<br>≥ 60                                                             | Hip: W-96, M-31                                                                 | Radiology<br>reports                                                                                                                                                     | DM - With BMD<br>Hip- W-0.85; M - 0.85                                                                                                                                          |
| Nguyen<br>(2008) [69]*           | Gen. Pop.<br>(Australia)  | Prosp. Cohort<br>W median 13<br>yrs;<br>M median 12<br>yrs | NA                                                                                                                              | 3,676 | 2,396                    | 56.7% | W 71 yrs<br>M 70 yrs<br>(≥ 60)                                         | MOP: W-426; M-149                                                               | Radiology<br>reports                                                                                                                                                     | With BMD<br>MOP W- 0.757; M -<br>0.754                                                                                                                                          |
| Langsetm<br>(2011) [68]*         | Gen. Pop.<br>(Canada)     | Prosp. Cohort<br>8.6 yrs                                   | NA                                                                                                                              | 9,423 | 5,758                    | 72.1% | 68 yrs<br>(55-95)                                                      | MOP: W-583; M-116                                                               | Self report<br>annually and<br>78% Radiogra-<br>phic confirmed                                                                                                           | With BMD<br>MOP: W-0.69; M- 0.70<br>Hip W-0.80; M- 0.85                                                                                                                         |
| <b>GARVAN + FRAX<sup>®</sup></b> |                           |                                                            |                                                                                                                                 |       |                          |       |                                                                        |                                                                                 |                                                                                                                                                                          |                                                                                                                                                                                 |
| Sandhu<br>(2010) [55]            | OP Screen.<br>(Australia) | Retr. Cohort<br>Fct-1.7 yrs<br>No Fct-3.7 yrs              | If any prior MOP fracture, any treatment<br>with bone-specific agent for > 30 months,<br>or presence of metabolic bone disorder | 530   | 200                      | 72%   | W Fct -73 yrs<br>W No Fct -68<br>yrs<br>M Fct- 75 yrs<br>M No Fct - 68 | MOP FRAX <sup>®</sup> W-69<br>MOP FRAX <sup>®</sup> M-31                        | Medical records                                                                                                                                                          | <b>FRAX<sup>®</sup>-US</b><br>MOP: W- 0.77;0.54<br><b>FRAX<sup>®</sup>-UK</b><br>MOP: W-0.78; M-0.57<br><b>GARVAN</b>                                                           |

|                                  |                                  |                                                                                      |                                                                                                                                                                                                                                                           |                                      |                                |                              |                                                                                       |                                                                    |                                           |                                                                                                                                             |
|----------------------------------|----------------------------------|--------------------------------------------------------------------------------------|-----------------------------------------------------------------------------------------------------------------------------------------------------------------------------------------------------------------------------------------------------------|--------------------------------------|--------------------------------|------------------------------|---------------------------------------------------------------------------------------|--------------------------------------------------------------------|-------------------------------------------|---------------------------------------------------------------------------------------------------------------------------------------------|
|                                  |                                  |                                                                                      |                                                                                                                                                                                                                                                           |                                      |                                |                              | yrs<br>(60-90)                                                                        |                                                                    |                                           | MOP: W-0.84; M-0.76                                                                                                                         |
| Bolland<br>(2011) [39]*          | Post. Menop.<br>(New Zealand)    | Prosp. Cohort<br>8.8 yrs                                                             | Women with major medical conditions, and if they were taking treatment for OP (including HRT or vitamin D supplements in doses > 1000 IU/day and had serum 25(OH)D levels ≥25 nmol/L. Not have a measurement of femoral neck BMD at baseline              | 1,471                                | 1,422                          | 100%                         | 74.2 yrs<br>(≥ 55)                                                                    | MOP FRAX®- 16%<br>MOP GARVAN-19.6%<br>Hip- 4%                      | Self report                               | <b>FRAX</b><br>With BMD<br>MOP-0.64<br>Hip-0.70<br>Without BMD<br>MOP-0.62<br>Hip-0.69<br><b>GARVAN</b><br>With BMD<br>MOP-0.64<br>Hip-0.67 |
| Sambrook<br>(2011) [54]          | Gen. Pop.<br>(10 countries)      | Prosp. Cohort<br>2 yrs                                                               | Women were excluded if they were unable to complete the study survey owing to cognitive impairment, language barriers, institutionalization, or illness, aged younger than 60 years, those on antiosteoporotic medication, and those with incomplete data | 60,393                               | 19,586                         | 100%                         | NA<br>(≥ 60)                                                                          | MOP FRAX®- 468<br>MOP GARVAN- 538<br>Hip- 69                       | Self-reported                             | <b>FRAX®:</b><br>Without BMD<br>MOP-0.60<br>Hip-0.65<br><b>GARVAN</b><br>Without BMD<br>MOP-0.64<br>Hip-0.61                                |
| <b>QFracture®</b>                |                                  |                                                                                      |                                                                                                                                                                                                                                                           |                                      |                                |                              |                                                                                       |                                                                    |                                           |                                                                                                                                             |
| Hippisley-Cox (2009) [33]*       | Gen. Pop.<br>(England and Wales) | Prosp. Cohort<br>DM- 7,898,208<br>person yrs<br>VM- 4,401,261<br>person yrs          | Patients with no previous recorded fracture, temporary residents, and patients with interrupted periods of registration with the practice and patients who did not have a valid Townsend deprivation score.                                               | DM-<br>2,391,756<br>VM-<br>1,294,732 | DM- 2,357,895<br>VM-1,275,917  | DM-<br>50.2%<br>VM-<br>50.3% | DM - Median<br>W 48 yrs<br>M 46 yrs<br>VM - Median<br>W 49 yrs<br>M 46 yrs<br>(30-85) | DM<br>MOP-32,284 Hip-12,369<br>VM<br>MOP-18,471<br>Hip- 7,162      | Recorded on the<br>GP computer<br>records | VM<br>MOP: W- 0.79; M-0.69<br>Hip: W- 0.89; M- 0.86                                                                                         |
| Collins<br>(2011) [70]*          | Gen. Pop.<br>(UK)                | Prosp. Cohort<br>Median MOP -<br>5.98 yrs<br>Hip - 6.03 yrs                          | Patients with no previously recorded fracture (hip, distal radius, or vertebra), temporary residents, and had no interrupted periods of registration with a practice                                                                                      | 2,244,636                            | 2,209,451                      | 50.6%                        | Median<br>W 48 yrs<br>M 47 yrs<br>(30-85)                                             | MOP-25,208<br>Hip- 12,188                                          | Recorded on the<br>GP computer<br>records | MOP: W- 0.82; M-0.74<br>Hip: W-0.89; M-0.86                                                                                                 |
| <b>Updated QFracture® (2012)</b> |                                  |                                                                                      |                                                                                                                                                                                                                                                           |                                      |                                |                              |                                                                                       |                                                                    |                                           |                                                                                                                                             |
| Hippisley-Cox (2012) [71]*       | Gen. Pop.<br>(UK)                | Prosp. Cohort<br>DM-<br>23,608,337<br>person yrs,<br>VM-<br>11,732,106<br>person yrs | Any described                                                                                                                                                                                                                                             | NA                                   | DM- 3,142,673<br>VM- 1,583,373 | DM-<br>50.9%<br>VM-<br>49.2% | DM - 50 yrs<br>VM - 50 yrs<br>(30-100)                                                | DM<br>MOP- 59,772<br>Hip-20,028<br>VM<br>MOP- 28,685<br>Hip- 9,610 | Recorded on the<br>GP computer<br>records | VM<br>MOP: W- 0.79; M- 0.71<br>Hip: W- 0.89; M- 0.88                                                                                        |
| <b>QFracture® +FRAX®</b>         |                                  |                                                                                      |                                                                                                                                                                                                                                                           |                                      |                                |                              |                                                                                       |                                                                    |                                           |                                                                                                                                             |
| Cummins<br>(2011) [42]*          | OP Screen.<br>(UK and            | Retr. Cohort<br>NA                                                                   | Subjects who were receiving treatment for osteoporosis, those on corticosteroids, and                                                                                                                                                                     | NA                                   | Cases-246<br>Controls-338      | 100%                         | Fct - 68 yrs<br>Ctl - 66 yrs                                                          | MOP-246                                                            | NA                                        | <b>FRAX®</b><br>Without BMD                                                                                                                 |

|                                                                                     |                        |                                           |                                                                                                                                                                                              |        |                           |      |                                          |                                                     |                                           |                                                                                          |
|-------------------------------------------------------------------------------------|------------------------|-------------------------------------------|----------------------------------------------------------------------------------------------------------------------------------------------------------------------------------------------|--------|---------------------------|------|------------------------------------------|-----------------------------------------------------|-------------------------------------------|------------------------------------------------------------------------------------------|
|                                                                                     | Ireland)               |                                           | those with a secondary cause of osteoporosis such as malabsorption, chronic liver disease, renal failure, and malignant disease                                                              |        |                           |      | (50-85)                                  |                                                     |                                           | MOP W- 0.67<br>HIP W - 0.71<br><b>QFracture<sup>®</sup></b><br>MOP W 0.67<br>HIP W- 0.64 |
| <b>Score for estimating the long-term risk of fracture in post menopausal women</b> |                        |                                           |                                                                                                                                                                                              |        |                           |      |                                          |                                                     |                                           |                                                                                          |
| Van Staa (2006) [72]                                                                | OP Screen. (UK)        | Prosp. Cohort<br>DM-5.8 yrs<br>VM-5.6 yrs | Women with recent use of oral glucocorticoids.                                                                                                                                               | NA     | DM- 366,104<br>VM- 32,728 | 100% | NA<br>(≥ 50)                             | MOP-14,011<br>Clinical vertebral-1,610<br>Hip-6,453 | Recorded on the GP computer records       | DM<br>MOP - 0.60<br>Hip - 0.84<br>Clinical vertebral - 0.69<br>VM<br>NA                  |
| <b>Simplified fracture risk system</b>                                              |                        |                                           |                                                                                                                                                                                              |        |                           |      |                                          |                                                     |                                           |                                                                                          |
| Leslie (2009) [73]                                                                  | OP Screen. (Canada)    | Retr. Cohort<br>3.1 yrs                   | NA                                                                                                                                                                                           | NA     | 16,205                    | 100% | 65<br>(≥ 50)                             | NA                                                  | NA                                        | No AUC                                                                                   |
| <b>SOF</b>                                                                          |                        |                                           |                                                                                                                                                                                              |        |                           |      |                                          |                                                     |                                           |                                                                                          |
| Ahmed (2006) [74]                                                                   | Gen. Pop. (Norway)     | Prosp. Cohort<br>Max-5 yrs                | History of previous hip fracture                                                                                                                                                             | 5,795  | 1,410                     | 100% | No Hip- 69.5 yrs<br>Hip-70.4 yrs (65-84) | All non-vertebral Fct-170<br>Hip-49                 | Hospital codes discharge                  | No AUC                                                                                   |
| <b>WHI</b>                                                                          |                        |                                           |                                                                                                                                                                                              |        |                           |      |                                          |                                                     |                                           |                                                                                          |
| Hundrup (2010) [75]                                                                 | Post. Menop. (Denmark) | Prosp. Cohort 5 yrs                       | Premenopausal women with: 50<age<79 yrs; 42<weight <162 kg; 140<height<179 cm. If they had missing items in the questionnaire on smoking status, physical activity and self-reported health. | 15,648 | 13,353                    | 100% | 61 yrs<br>(≥ 45)                         | Hip-122                                             | Recorded on the national register records | Hip-0.82                                                                                 |

AUC, Area Under the Curve; CI, Confidence Interval; Cros. Cohort, Cross-sectional Cohort; Ctl, Control; DM, Derivation model; Frt, Fracture; Gen. Pop., General Population; GP – General Practitioner; HRT, Hormone Replacement Therapy; M, Man; MOP, Major Osteoporotic Fracture; NA, Not available; Post. Menop., Post Menopausal; Prosp. Cohort, Prospective Cohort; Retr. Cohort, Retrospective Cohort; OP Screen., Osteoporosis Screening; VM, Validation model; W, Women; yrs, Years

\* Included in Meta-analysis
