# Supplementary material for: The accuracy of osteoporotic fracture risk prediction tools: a systematic review and meta-analysis
Source: HighWire-hosted journal article supplement (doi:10.1136/annrheumdis-2015-207907), 2015-08-07
Supplement: annrheumdis-2015-207907supp_tableS5.pdf [file annrheumdis-2015-207907supp_tableS5.pdf]

**Supplementary Table S5** – Articles excluded from the meta-analysis. All studies with FRAX<sup>®</sup>.

| Article                  | Reason of exclusion                                                                                                                      |
|--------------------------|------------------------------------------------------------------------------------------------------------------------------------------|
| Sornay-Rendu (2010) [55] | Number of fractures <100                                                                                                                 |
| Hillier (2011) [48]      | Authors only provide AUC values for specific subgroups accordingly to specific objectives of the study (different BMD categories).       |
| Leslie (2011) [49]       | The AUC values were provided regarding specific objectives of study (Use of T-score of lumbar spine or femoral neck)                     |
| Leslie (2011) [51]       | The AUC values were provided regarding specific objectives of study (Use of T-score of lumbar spine or femoral neck)                     |
| Tamaki (2011) [58]       | Number of fractures <100                                                                                                                 |
| Premaor (2013) [61]      | No additional information provided by authors                                                                                            |
| Azagra (2014) [37]       | Number of fractures <100                                                                                                                 |
| Brennan (2014) [39]      | Authors only provide AUC values for specific subgroups accordingly to specific objectives of the study (different socioeconomic status). |
| Sambrook (2011) [53]     | No additional information provided by authors                                                                                            |
| Sandhu (2010) [54]       | FRAX <sup>®</sup> model not validated for the country; Number of fractures <100                                                          |

AUC, Area Under the Curve; BMD, Bone Mass Density.
